# Supplementary material for: Provoked Vestibulodynia and Topical Treatment: A New Option
Source: MDPI journal article supplement (doi:10.3390/healthcare10050830), 2022-04-30
Supplement: s1 [file s1]

---

**Supplementary Materials****Table S1.** Drug compliance.

| <b>Parameter/Statistics</b> | <b>Active</b> | <b>Placebo</b> |
|-----------------------------|---------------|----------------|
| Overall IP Compliance %     |               |                |
| n                           | 20            | 20             |
| Mean (SD)                   | 100.0(0.00)   | 100.0(0.00)    |
| Median                      | 100.0         | 100.0          |
| Min, Max                    | 100,100       | 100,100        |

Table S2. Descriptive statistics for physical examination.

| Parameter/Statistics                      | Visit     | Active    | Placebo   |
|-------------------------------------------|-----------|-----------|-----------|
| <b>General Appearance</b>                 |           |           |           |
| Normal                                    | Screening | 20(100.0) | 20(100.0) |
| Abnormal                                  | Screening | 0(0.0)    | 0(0.0)    |
| Not Done                                  | Screening | 0(0.0)    | 0(0.0)    |
| Normal                                    | Visit 3   | 20(100.0) | 20(100.0) |
| Abnormal                                  | Visit 3   | 0(0.0)    | 0(0.0)    |
| Not Done                                  | Visit 3   | 0(0.0)    | 0(0.0)    |
| Normal                                    | Visit 4   | 20(100.0) | 20(100.0) |
| Abnormal                                  | Visit 4   | 0(0.0)    | 0(0.0)    |
| Not Done                                  | Visit 4   | 0(0.0)    | 0(0.0)    |
| Normal                                    | Visit 4   | 20(100.0) | 20(100.0) |
| Abnormal                                  | Visit 4   | 0(0.0)    | 0(0.0)    |
| Not Done                                  | Visit 4   | 0(0.0)    | 0(0.0)    |
| <b>Head, Eyes, Ears, Nose, and Throat</b> |           |           |           |
| Normal                                    | Screening | 20(100.0) | 20(100.0) |
| Abnormal                                  | Screening | 0(0.0)    | 0(0.0)    |
| Not Done                                  | Screening | 0(0.0)    | 0(0.0)    |
| Normal                                    | Visit 3   | 20(100.0) | 20(100.0) |
| Abnormal                                  | Visit 3   | 0(0.0)    | 0(0.0)    |
| Not Done                                  | Visit 3   | 0(0.0)    | 0(0.0)    |
| Normal                                    | Visit 4   | 20(100.0) | 20(100.0) |
| Abnormal                                  | Visit 4   | 0(0.0)    | 0(0.0)    |
| Not Done                                  | Visit 4   | 0(0.0)    | 0(0.0)    |
| Normal                                    | Visit 4   | 20(100.0) | 20(100.0) |
| Abnormal                                  | Visit 4   | 0(0.0)    | 0(0.0)    |
| Not Done                                  | Visit 4   | 0(0.0)    | 0(0.0)    |
| <b>Abdomen</b>                            |           |           |           |
| Normal                                    | Screening | 20(100.0) | 20(100.0) |
| Abnormal                                  | Screening | 0(0.0)    | 0(0.0)    |
| Not Done                                  | Screening | 0(0.0)    | 0(0.0)    |
| Normal                                    | Visit 3   | 20(100.0) | 20(100.0) |
| Abnormal                                  | Visit 3   | 0(0.0)    | 0(0.0)    |
| Not Done                                  | Visit 3   | 0(0.0)    | 0(0.0)    |
| Normal                                    | Visit 4   | 20(100.0) | 20(100.0) |
| Abnormal                                  | Visit 4   | 0(0.0)    | 0(0.0)    |
| Abnormal                                  | Screening | 0(0.0)    | 0(0.0)    |
| Not Done                                  | Screening | 0(0.0)    | 0(0.0)    |
| Normal                                    | Visit 3   | 20(100.0) | 20(100.0) |
| Abnormal                                  | Visit 3   | 0(0.0)    | 0(0.0)    |
| Not Done                                  | Visit 3   | 0(0.0)    | 0(0.0)    |
| Normal                                    | Visit 4   | 20(100.0) | 20(100.0) |
| Abnormal                                  | Visit 4   | 0(0.0)    | 0(0.0)    |
| Not Done                                  | Visit 4   | 0(0.0)    | 0(0.0)    |
| Normal                                    | Visit 4   | 20(100.0) | 20(100.0) |
| Abnormal                                  | Visit 4   | 0(0.0)    | 0(0.0)    |
| Not Done                                  | Visit 4   | 0(0.0)    | 0(0.0)    |
| <b>Gastrointestinal</b>                   |           |           |           |
| Normal                                    | Screening | 20(100.0) | 20(100.0) |
| Abnormal                                  | Screening | 0(0.0)    | 0(0.0)    |
| Not Done                                  | Screening | 0(0.0)    | 0(0.0)    |
| Normal                                    | Visit 3   | 20(100.0) | 20(100.0) |
| Abnormal                                  | Visit 3   | 0(0.0)    | 0(0.0)    |
| Not Done                                  | Visit 3   | 0(0.0)    | 0(0.0)    |
| Normal                                    | Visit 4   | 20(100.0) | 20(100.0) |

|                        |           |           |           |
|------------------------|-----------|-----------|-----------|
| Abnormal               | Visit 4   | 0(0.0)    | 0(0.0)    |
| Not Done               | Visit 4   | 0(0.0)    | 0(0.0)    |
| Normal                 | Visit 4   | 20(100.0) | 20(100.0) |
| Abnormal               | Visit 4   | 0(0.0)    | 0(0.0)    |
| Not Done               | Visit 4   | 0(0.0)    | 0(0.0)    |
| <b>Musculoskeletal</b> |           |           |           |
| Normal                 | Screening | 20(100.0) | 20(100.0) |
| Abnormal               | Screening | 0(0.0)    | 0(0.0)    |
| Not Done               | Screening | 0(0.0)    | 0(0.0)    |
| Normal                 | Visit 3   | 20(100.0) | 20(100.0) |
| Abnormal               | Visit 3   | 0(0.0)    | 0(0.0)    |
| Not Done               | Visit 3   | 0(0.0)    | 0(0.0)    |
| Normal                 | Visit 4   | 20(100.0) | 20(100.0) |
| Abnormal               | Visit 4   | 0(0.0)    | 0(0.0)    |
| Not Done               | Visit 4   | 0(0.0)    | 0(0.0)    |
| Normal                 | Visit 4   | 20(100.0) | 20(100.0) |
| Abnormal               | Visit 4   | 0(0.0)    | 0(0.0)    |
| Not Done               | Visit 4   | 0(0.0)    | 0(0.0)    |
| <b>Neurological</b>    |           |           |           |
| Normal                 | Screening | 20(100.0) | 20(100.0) |
| Abnormal               | Screening | 0(0.0)    | 0(0.0)    |
| Not Done               | Screening | 0(0.0)    | 0(0.0)    |
| Normal                 | Visit 3   | 20(100.0) | 20(100.0) |
| Abnormal               | Visit 3   | 0(0.0)    | 0(0.0)    |
| Not Done               | Visit 3   | 0(0.0)    | 0(0.0)    |
| Normal                 | Visit 4   | 20(100.0) | 20(100.0) |
| Abnormal               | Visit 4   | 0(0.0)    | 0(0.0)    |
| Not Done               | Visit 4   | 0(0.0)    | 0(0.0)    |
| Normal                 | Visit 4   | 20(100.0) | 20(100.0) |
| Abnormal               | Visit 4   | 0(0.0)    | 0(0.0)    |
| Not Done               | Visit 4   | 0(0.0)    | 0(0.0)    |
